# Supplementary material for: Outcomes and risk assessment in pulmonary veno-occlusive disease
Source: PubMed Central journal article supplement — ERJ Open Res. 2024 Jan 15;10(1):00612-2023. doi: 10.1183/23120541.00612-2023 (PMC10789263; doi:10.1183/23120541.00612-2023), 2024-01-15
Supplement: 00612-2023.SUPPLEMENT.pdf [file 00612-2023.SUPPLEMENT.pdf]

**Supplemental Table 1: Multivariable Cox analyses**

|                                  | Model A      |                     |         | Model B      |                     |         | Model C      |                     |         | Model D      |                     |         |
|----------------------------------|--------------|---------------------|---------|--------------|---------------------|---------|--------------|---------------------|---------|--------------|---------------------|---------|
|                                  | Hazard ratio | CI 95%              | P-value |
| <b>NYHA FC, per class</b>        | 1.262        | 0.820<br>–<br>1.944 | 0.291   | 1.148        | 0.728<br>–<br>1.809 | 0.552   | 1.103        | 0.678<br>–<br>1.795 | 0.693   | 1.262        | 0.820<br>–<br>1.942 | 0.291   |
| <b>6MWD, per m</b>               | 0.997        | 0.995<br>–<br>0.998 | <0.001  | 0.997        | 0.995<br>–<br>0.999 | 0.006   | 0.997        | 0.996<br>–<br>0.999 | 0.007   | 0.997        | 0.995<br>–<br>0.998 | <0.001  |
| <b>NT-proBNP, per ng/L</b>       | 1.000        | 1.000<br>–<br>1.000 | 0.157   | 1.000        | 1.000<br>–<br>1.000 | 0.099   | 1.000        | 1.000<br>–<br>1.000 | 0.125   | 1.000        | 1.000<br>–<br>1.000 | 0.157   |
| <b>PaO<sub>2</sub>, per mmHg</b> |              |                     |         | 0.997        | 0.974<br>–<br>1.020 | 0.777   |              |                     |         |              |                     |         |
| <b>DLco, per %</b>               |              |                     |         |              |                     |         | 0.990        | 0.963<br>–<br>1.018 | 0.494   |              |                     |         |
| <b>Age, per year</b>             |              |                     |         |              |                     |         |              |                     |         | 0.998        | 0.971<br>–<br>1.026 | 0.900   |

*Abbreviations:* DLco: diffusing capacity for carbon monoxide; NT-proBNP: N-terminal pro-brain natriuretic peptide; NYHA FC: New York Heart Association functional class; 6-MWD: 6-minute walking distance

**Supplemental Table 2: Baseline risk status according to different risk assessment methods**

|                                                 | Low risk | Intermediate risk     |                        | High risk |
|-------------------------------------------------|----------|-----------------------|------------------------|-----------|
|                                                 |          | Intermediate-low risk | Intermediate-high risk |           |
| <b>REVEAL 2.0, n (%)</b>                        | 59 (18)  | 50 (15)               |                        | 218 (67)  |
| <b>REVEAL Lite 2, n (%)</b>                     | 66 (20)  | 62 (19)               |                        | 199 (61)  |
| <b>ESC/ERS guidelines 3 strata model, n (%)</b> | 46 (14)  | 224 (69)              |                        | 57 (17)   |
| <b>ESC/ERS guidelines 4 strata model, n (%)</b> | 19 (6)   | 79 (24)               | 162 (50)               | 67 (20)   |

|                                                             | <b>4</b> | <b>3</b> | <b>2</b> | <b>1</b> | <b>0</b> |
|-------------------------------------------------------------|----------|----------|----------|----------|----------|
| <b>Number of low-risk criteria (/4), n (%)</b>              | 5 (2)    | 32 (10)  | 76 (23)  | 122 (37) | 92 (28)  |
| <b>Number of non-invasive low risk criteria (/3), n (%)</b> |          | 12 (3.5) | 28 (8.5) | 62 (19)  | 225 (69) |

**4 low-risk criteria:** NYHA FC I-II, 6-MWD >440 m, right atrial pressure (RAP) <8 mmHg, cardiac index (CI)  $\geq$  2.5 L/min/m<sup>2</sup>

**3 non-invasive low risk criteria:** NYHA FC I-II, 6-MWD >440 m, BNP <50 ng/L or NT-proBNP <300 ng/L

**Supplemental Table 3:****Sensitivity analysis in 81 patients under 60 years of age: Comparison of the discrimination of risk scores calculated at baseline and at first follow-up using Harrell's c-statistic.**

|                                               | <b>Baseline</b><br><b>C index (CI 95%)</b> | <b>Follow-up</b><br><b>C index (CI 95%)</b> |
|-----------------------------------------------|--------------------------------------------|---------------------------------------------|
| REVEAL 2.0                                    | 0.67 (0.57 – 0.77)                         | 0.75 (0.63 – 0.86)                          |
| REVEAL Lite 2                                 | 0.67 (0.59 – 0.75)                         | 0.75 (0.64 – 0.86)                          |
| ESC / ERS risk score in 3 strata              | 0.65 (0.57 – 0.74)                         | 0.69 (0.54 – 0.83)                          |
| ESC/ ERS risk score in 4 strata               | 0.67 (0.58 – 0.75)                         | 0.81 (0.71 – 0.91)                          |
| Number of low-risk criteria (/4)              | 0.63 (0.53 – 0.73)                         | 0.69 (0.53 – 0.85)                          |
| Number of non-invasive low risk criteria (/3) | 0.65 (0.55 – 0.74)                         | 0.78 (0.68 – 0.88)                          |

**Supplemental Table 4: Baseline characteristics of PAH patients (after matching on age, sex and PVR by propensity score according to the ratio 1 PVOD / 3 PAH)**

| <b>Characteristic</b>                           | <b>PAH Patients (n=696)</b>   |
|-------------------------------------------------|-------------------------------|
| Age, years                                      | 65±13                         |
| Female sex, n (%)                               | 206 (30)                      |
| Body mass index, kg/m <sup>2</sup>              | 27.5±5.6                      |
| <b>Aetiology of PAH, n (%)</b>                  |                               |
| Idiopathic PAH                                  | 337 (48)                      |
| Heritable PAH                                   | 29 (4)                        |
| Drug and toxin-induced                          | 53 (8)                        |
| Connective tissue disease                       | 151 (22)                      |
| Systemic sclerosis                              | 120                           |
| Congenital heart disease                        | 1 (0)                         |
| HIV infection                                   | 16 (2)                        |
| Porto pulmonary hypertension                    | 109 (16)                      |
| <b>Comorbidities, n (%)</b>                     |                               |
| Obesity                                         | 204 (29)                      |
| Coronary heart disease                          | 84 (12)                       |
| Diabetes mellitus                               | 161 (23)                      |
| Hypertension                                    | 329 (47)                      |
| <b>NYHA FC, n (%)</b>                           |                               |
| I-II / III / IV                                 | 222 (32) / 382 (55) / 92 (13) |
| <b>6-MWD, m</b>                                 | 320 (208 – 402)               |
| <b>NT-proBNP, ng/L (n 306)</b>                  | 1056 (426 – 2476)             |
| <b>BNP, ng/L (n = 390)</b>                      | 265 (83 – 547)                |
| <b>Increased BNP or NT-proBNP, n (%)</b>        | 563 (81)                      |
| <b>Haemodynamics</b>                            |                               |
| Right atrial pressure, mmHg                     | 8 ± 5                         |
| Mean pulmonary arterial pressure, mmHg          | 45 ± 11                       |
| Pulmonary artery wedge pressure, mmHg           | 9 ± 4                         |
| Cardiac output, L/min                           | 4.6 ± 1.4                     |
| Cardiac index, L/min/m <sup>2</sup>             | 2.5 ± 0.7                     |
| Pulmonary vascular resistance, WU               | 8.8 ± 4.4                     |
| SvO <sub>2</sub> , %                            | 63 ± 9                        |
| Heart rate, bpm                                 | 76 ± 16                       |
| Stroke Volume Index, ml/m <sup>2</sup>          | 33 ± 11                       |
| <b>Pulmonary function tests</b>                 |                               |
| FEV-1, % of predicted                           | 86 ± 19                       |
| FVC, % of predicted                             | 93 ± 20                       |
| TLC, % of predicted                             | 92 ± 18                       |
| DLco, % of predicted                            | 47 ± 19                       |
| DLco/AV, % of predicted                         | 58 ± 22                       |
| <b>Arterial blood gases on ambient room air</b> |                               |
| PaO <sub>2</sub> , mmHg                         | 64 ± 17                       |
| PaCO <sub>2</sub> , mmHg                        | 33 ± 6                        |

|                                                                |          |
|----------------------------------------------------------------|----------|
| <b>Risk stratification at baseline (3-strata model), n (%)</b> |          |
| Low-risk                                                       | 106 (15) |
| Intermediate-risk                                              | 501 (72) |
| High-risk                                                      | 89 (13)  |
| <b>Risk stratification at baseline (4-strata model), n (%)</b> |          |
| Low-risk                                                       | 68 (10)  |
| Intermediate-low risk                                          | 250 (36) |
| Intermediate-high risk                                         | 299 (40) |
| High-risk                                                      | 79 (15)  |

*Abbreviations:* ; BNP: brain natriuretic peptide; DLco: diffusing capacity for carbon monoxide; DLco/AV: diffusing capacity for carbon monoxide to alveolar volume ratio; FEV-1: forced expiratory volume in 1 second; FVC: forced vital capacity; HIV: human immunodeficiency virus; NT-proBNP: N-terminal pro-brain natriuretic peptide; NYHA FC: New York Heart Association functional class; PaO<sub>2</sub>: partial pressure of oxygen; PaCO<sub>2</sub>: partial pressure of carbon dioxide; PAH: pulmonary arterial hypertension; 6-MWD: 6-minute walking distance; SvO<sub>2</sub>: mixed venous oxygen saturation; TLC: total lung capacity.
